# Supplementary material for: Rebuilding Soil Ecosystems for Improved Productivity in Biosolarized Soils
Source: Hindawi journal article supplement (doi:10.1155/2019/5827585), 2019-10-13
Supplement: f1 [file 5827585.f1.pdf]

## Supplementary Materials

### MAKING LEM AND FALSE – LEM

#### LEM

The LEM is made by collecting 30 gallon sack (30 gallon capacity) of O horizon (loose and partly decayed organic matter) from healthy, well established upland, mixed pine and hardwood forests, which provides the microbial inoculant. The microbial inoculant is combined with one 50-lb sack of organic semolina, 1/2 cup of active dry baker's yeast and 22 lb of crushed hardwood charcoal. A liquid solution consisting of one gallon of feed-grade molasses, one gallon of unpasteurized, nonhomogenized milk, and one gallon of non-chlorinated water are then blended into the solid mixture. Once the liquid and solid mixtures have been well blended, the LEM is placed into a 190 L-container and sealed to ferment for 6 weeks and kept at temperatures above 5<sup>0</sup> C and below 30<sup>0</sup> C. To make the liquid LEM solution, 3kg of solid fermented LEM mixture are place in a porous sack and suspended in a 100 L-container with a 16:1 of water: molasses solution. The container is sealed and the liquid LEM solution is allowed to ferment for at least 2 weeks.

#### False-LEM

Because the growing media (molasses and semolina, yeast and raw milk) contain nutrients and microbes, the False-LEM (F-LEM) treatment solution is formulated without the forest microbial inoculant but with the growing media. The False-LEM mixture is prepared under the same conditions as the LEM using the molasses, semolina, milk, yeast and charcoal at the same ratio as the LEM.

## MATURITY INDEX, STRUCTURAL INDEX AND ENRICHMENT INDEX

**Maturity Index (MI)** =  $\frac{\sum v_i \times f_i}{n}$  where  $v_i$  = colonizer-persister value (c-p) value assigned to family (Bongers 1990),  $f_i$  = frequency of family in sample and  $n$  = total number of individuals in a sample.

$$\text{Enrichment Index (EI)} = \frac{100 \times e}{e+b}$$

$$\text{Structure Index (SI)} = \frac{100 \times s}{s+b}$$

Calculated using (c-p) values combined with functional guilds: Bacterial-feeding (Ba), Fungal-feeding (Fu), Carnivorous (Ca), Omnivorous (Om).

Where:

$$b = (Ba_2 + Fu_2) W_2 \text{ where } W_2 = 0.8$$

$$e = (Ba_1 W_1) + (Fu_2 W_2) \text{ where } W_1 = 3.2 \text{ and } W_2 = 0.8$$

$$s = (Ba_n W_n) + (Ca_n W_n) + (Fu_n W_n) + (Om_n W_n) \text{ where } n=3-5, W_3= 1.8, W_4 = 3.2, W_5 = 5.0$$
